# Supplementary material for: Human AI collaboration for unsupervised categorization of live surgical feedback
Source: PubMed Central journal article supplement — NPJ Digit Med. 2024 Dec 20;7:372. doi: 10.1038/s41746-024-01383-3 (PMC11662073; doi:10.1038/s41746-024-01383-3), 2024-12-20
Supplement: 41746_2024_1383_MOESM1_ESM.pdf [file 41746_2024_1383_MOESM1_ESM.pdf]

## Supplementary Information

### Supplementary Note A: Instruction to GPT-4 for Generating Topic Titles

The instruction prompt was given to GPT-4 to suggest a short topic name. The *[DOCUMENT]* slot is replaced by 10 most representative example feedback instances under the topics. The *[KEYWORDS]* slot is filled with 10 most representative keywords for the topic, following KeyBERTInspired representation<sup>1</sup>.

*I have a topic in the context of a trainer giving trainees feedback on surgical tasks that contains the following instances: [DOCUMENTS]*

*The topic is described by the following keywords: [KEYWORDS]*

*Based on the above information, can you give a short label for the topic?*

### Supplementary Note B: Trainee Behavioral Adjustment Prediction - Variables of Importance

| Outcome: Behavioral Response |         |                                   |        |
|------------------------------|---------|-----------------------------------|--------|
| Rank                         | GiniOOB | Predictor                         | Source |
| 1                            | 0.0291  | Error of omission                 | Human  |
| 2                            | 0.0135  | 1. Pulling, Retraction            | AI     |
| 3                            | 0.0066  | Praise                            | Human  |
| 4                            | 0.0059  | Good trainee action               | Human  |
| 5                            | 0.0034  | 8. Trainer's Queries              | AI     |
| 6                            | 0.0014  | 11. Sweeping Techniques           | AI     |
| 7                            | 0.0013  | Visual Aid                        | Human  |
| 8                            | 0.0012  | Technical                         | Human  |
| 9                            | 0.0010  | 3. Prostate & Urethra Positioning | AI     |
| 10                           | 0.0009  | 5. Instrument Positioning         | AI     |
| 11                           | 0.0005  | 10. Trainer's Intervention        | AI     |
| 12                           | 0.0003  | 7. Handling Bleeding              | AI     |

**Supplementary Table 1.** Ordered variables of importance in the Random Forest-based prediction of Trainee Behavioral Response. The AI-discovered topics coded as binary predictors are highlighted.

### Supplementary Note C: Trainee Verbal Acknowledgment Prediction - Variables of Importance

| Outcome: Verbal Response |         |                             |        |
|--------------------------|---------|-----------------------------|--------|
| Rank                     | OOBGini | Predictor                   | Source |
| 1                        | 0.0313  | Good trainee action         | Human  |
| 2                        | 0.0070  | 2. Encouraging Continuation | AI     |
| 3                        | 0.0050  | 11. Sweeping Techniques     | AI     |
| 4                        | 0.0029  | Technical                   | Human  |
| 5                        | 0.0018  | Procedural                  | Human  |
| 6                        | 0.0011  | Error of omission           | Human  |
| 7                        | 0.0006  | 7. Handling Bleeding        | AI     |
| 8                        | 0.0003  | 8. Trainer's Queries        | AI     |

**Supplementary Table 2.** Ranked variables of importance in the Random Forest Trainee Verbal Response prediction. The AI-discovered topics coded as binary predictors are highlighted.

### Supplementary Note D: Analyzing the Impact of Human Refinement on Downstream Tasks

| Category         | Behavior Outcome            | Difference   |               | AI + Human Refinement |              | AI Initial |              |
|------------------|-----------------------------|--------------|---------------|-----------------------|--------------|------------|--------------|
|                  |                             | $\Delta$ AUC | 95% CI        | AUC                   | 95% CI       | AUC        | 95% CI       |
| Trainee Behavior | Verbal Acknowledgment       | 0.01         | (0.00, 0.02)  | 0.69                  | (0.67, 0.71) | 0.68       | (0.67, 0.70) |
|                  | Behavioral Adjustment       | -0.01        | (-0.02, 0.00) | 0.73                  | (0.72, 0.75) | 0.74       | (0.73, 0.76) |
|                  | Ask for Clarification       | -0.02        | (-0.05, 0.02) | 0.57                  | (0.52, 0.62) | 0.59       | (0.53, 0.64) |
| Trainer Reaction | Approval                    | 0.00         | (-0.01, 0.01) | 0.65                  | (0.63, 0.68) | 0.65       | (0.63, 0.68) |
|                  | Disapproval                 | 0.00         | (-0.03, 0.03) | 0.55                  | (0.49, 0.61) | 0.55       | (0.48, 0.61) |
|                  | Taking Control (safety)     | -0.01        | (-0.05, 0.03) | 0.83                  | (0.73, 0.94) | 0.84       | (0.74, 0.94) |
|                  | Taking Control (non-safety) | -0.01        | (-0.04, 0.01) | 0.79                  | (0.73, 0.85) | 0.80       | (0.75, 0.86) |

**Supplementary Table 3.** Comparison of AI-Discovered Topics before and after Human Refinement for predicting behavioral outcomes following surgical feedback. The analysis was performed using 5-fold cross-validation. Statistically significant differences are underscored.

### Supplementary Note E: Analysis of Different Supervised Methods

Supplementary Table 4 presents the results of using different supervised models for the prediction of *Trainee Behavioral Adjustment* and *Trainer Reaction*. The main conclusion from this additional analysis is that the different supervised methods have little impact on the results, with all the AUCs from different models being within the estimated 95% confidence intervals of one another.

| Category         | Behavior Outcome            | Random Forest |              | AdaBoost    |              | Elastic Net |              |
|------------------|-----------------------------|---------------|--------------|-------------|--------------|-------------|--------------|
|                  |                             | AUC           | 95% CI       | AUC         | 95% CI       | AUC         | 95% CI       |
| Trainee Behavior | Verbal Acknowledgment       | 0.68          | (0.67, 0.70) | 0.68        | (0.67, 0.70) | 0.68        | (0.66, 0.70) |
|                  | Behavioral Adjustment       | <u>0.73</u>   | (0.72, 0.75) | 0.73        | (0.71, 0.75) | 0.71        | (0.69, 0.73) |
|                  | Ask for Clarification       | 0.51          | (0.45, 0.57) | 0.52        | (0.46, 0.58) | <u>0.55</u> | (0.49, 0.61) |
| Trainer Reaction | Approval                    | 0.66          | (0.63, 0.68) | 0.66        | (0.64, 0.68) | 0.66        | (0.64, 0.69) |
|                  | Disapproval                 | <u>0.59</u>   | (0.53, 0.66) | 0.52        | (0.46, 0.59) | 0.58        | (0.51, 0.65) |
|                  | Taking Control (safety)     | 0.85          | (0.75, 0.96) | <u>0.88</u> | (0.80, 0.96) | 0.87        | (0.78, 0.97) |
|                  | Taking Control (non-safety) | 0.78          | (0.72, 0.84) | <u>0.79</u> | (0.74, 0.85) | 0.76        | (0.70, 0.82) |

**Supplementary Table 4.** Results of 5-fold Cross Validation for Feedback Outcomes Prediction using AI topics after Human Refinement (but no Human categories) with Different Supervised Methods. Best performance is underscored.

## Supplementary Note F: Discovered AI-topics with Representative Feedback Instances

| # | Topic                                              | Size | Feedback Instances                                                                                                                                                                                                                                                                                |
|---|----------------------------------------------------|------|---------------------------------------------------------------------------------------------------------------------------------------------------------------------------------------------------------------------------------------------------------------------------------------------------|
| 0 | Affirmative Feedback and Inquiry                   | 755  | yeah that's reasonable<br>okay, that's pretty good<br>alright, nice job<br>good<br>I think you're good, I think you're doing well here                                                                                                                                                            |
| 1 | Pulling, Retraction and Positioning Techniques     | 908  | grab yep grab higher<br>pull this up, stop, don't cinch that since this one.<br>look up, you need to grab this<br>regrab, don't pull like that<br>cinch it, cinch it down                                                                                                                         |
| 2 | Encouraging Continuation and Progress              | 652  | alright keep going<br>so advance your... yeah, advance... good<br>yeah and just keep going<br>uh-huh, keep going<br>ok, right direction, mmhm                                                                                                                                                     |
| 3 | Guidance on Prostate and Urethra Positioning       | 482  | you can even come 1 mm closer to the prostate<br>so again, the key is to find the posterior plane, extend it to the urethra<br>okay, don't take the urethra, just take the DVC<br>look, if this shoulder is the prostate, put your scissors on it and snip<br>i would come closer to the prostate |
| 4 | Visual Guidance and Recognition                    | 708  | so where do you want to go?<br>so you want to be here, does that make sense?<br>you are going to be in his way, so you're going to have to...<br>go in right there<br>do you see it pulsating behind the nerve?                                                                                   |
| 5 | Managing Instrument Positioning and the Fourth Arm | 666  | I would just grab that with the fourth arm<br>make sure you travel here<br>Pull through, grab that with your 4th arm.<br>take control of your fourth arm<br>that was decent travel, probably no more than that though                                                                             |
| 6 | Tissue and Vein Handling Precautions               | 589  | I'm glad you're cautious, but you're like... barely touching the tissue<br>be careful don't avulse that vein<br>that's probably the vein that you just cut<br>mhm, better grab of the tissue, good<br>and you just ripped the tissue off, that's not exactly what I want to see                   |
| 7 | Controlling and Addressing Bleeding                | 241  | solve that bleeding problem, it's going to keep bleeding until you fix it...<br>there are a few open vessels... yeah, just burn those<br>stop whatever is bleeding here when you're done<br>buzz that, buzz that<br>there's something bleeding at about 10 or 11 o'clock position underneath it   |
| 8 | Trainer's Queries and Clarifications               | 309  | what did you do?<br>inv stuff that we talked about, prob gonna be here<br>what are you doing?<br>so what does that tell you?<br>what's that there? you think that's anything?                                                                                                                     |

**Supplementary Table 5.** Discovered AI-topics with representative feedback instances under each topic (first 9 topics)

| #  | Topic                                               | Size | Feedback Instances                                                                                                                                                                                                                                                                                         |
|----|-----------------------------------------------------|------|------------------------------------------------------------------------------------------------------------------------------------------------------------------------------------------------------------------------------------------------------------------------------------------------------------|
| 9  | Adjustment of Surgical Precision                    | 408  | come in a little bit more and retract down, does that make sense?<br>take one more... yeah, one more bite of that<br>just a little bit, just a little bit more<br>uhh.. the thing that's a little bit closer.. this thing<br>open out a little bit more                                                    |
| 10 | Trainer's Intervention and Visual Verification      | 251  | let me see<br>okay, can I show you?<br>okay, so can I show you one thing here, okay<br>let me help you<br>okay hold on let me see                                                                                                                                                                          |
| 11 | Sweeping Techniques in Surgical Procedures          | 219  | it's good, yeah... sweep all that off, since you're here<br>okay, don't rip it off, gentle<br>okay, so I don't like that long sweeping motion<br>sweep down, there<br>sweep, sweep, sweep, that should be a very blunt dissection                                                                          |
| 12 | Opening and Positioning Surgical Planes             | 331  | open and spread<br>so you can open up... you're going to have to open up the thing<br>if you have flow...don't want it to open<br>you want to open here maybe?<br>forget about extending, just open that space up                                                                                          |
| 13 | Guidance on Cutting and Clipping Techniques         | 268  | I usually cold cut<br>so your cuts should be down, directly down<br>why are we cutting all of this<br>just cut it<br>just take it, divide it about                                                                                                                                                         |
| 14 | Adjusting Surgical Positioning and Height Guidance  | 227  | <i>you have a little ways to go</i><br>too low, too low... I think... there<br>a little further back<br>a little higher, higher, higher<br>okay, so I usually don't look for it here. you usually look for it up higher                                                                                    |
| 15 | Maintaining and Identifying Correct Surgical Planes | 106  | stay in one plane, you're kind of... zig-zaggy<br>keep your planes stable, can't move the plane again and again<br>see the two difference in planes here<br>okay there's your plane now right?<br>like it should be one fat plane that comes together                                                      |
| 16 | Stitching Techniques and Knot-Tying                 | 177  | okay fine, yeah, it's your last stitch<br>so one, 2, 4, 5 stitch we are using<br>stop there. can we get a new stitch? I don't want the suture lines tied right over each other, okay?<br>what are we doing, why are we using acute stitches?<br>one more stitch here and then we will go to the other side |
| 17 | Handling and Positioning of the Vas and SV          | 94   | the medial side, yeah<br>yeah, you could probably get rid of the vas now<br>if you do it correctly, there should be a nice little septum here between right and left SV<br>as long as you don't separate the VAS from the SV... they retract both<br>thats the cava?                                       |
| 18 | Fat Dissection and Exposure                         | 112  | you can but you're just going to have to take all this fat off<br>dont cut into yellow fat<br>leave that endopelvic fat at the floor, this way<br>if you are in a lot of fat, you should probably go here<br>cinch that down cinch the yellow down                                                         |
| 19 | Layer Depth Assessment and Correction               | 45   | work layer by layer starting from here and progressing this way<br>no, open the superficial layer first<br>I think you're a layer too deep but...<br>exactly, but it's all stuck, so you need to be careful, layer by layer<br>yeah I think we are okay, second layer                                      |

**Supplementary Table 6.** Discovered AI-topics with representative feedback instances under each topic (last 11 topics) <sup>4/4</sup>
