# Supplementary material for: Human AI collaboration for unsupervised categorization of live surgical feedback
Source: PubMed Central journal article supplement — NPJ Digit Med. 2024 Dec 20;7:372. doi: 10.1038/s41746-024-01383-3 (PMC11662073; doi:10.1038/s41746-024-01383-3), 2024-12-20
Supplement: 41746_2024_1383_MOESM2_ESM.pdf [file 41746_2024_1383_MOESM2_ESM.pdf]

If noted as **Deep Stitch**: Research reported in this publication was supported by the National Cancer Institute of the National Institutes of Health under Award Number R01CA251579. The content is solely the responsibility of the authors and does not necessarily represent the official views of the National Institutes of Health.

If noted as **Deep Dissect**: Research reported in this publication was supported by the National Cancer Institute of the National Institutes of Health under Award Number R01CA273031. The content is solely the responsibility of the authors and does not necessarily represent the official views of the National Institutes of Health.
